# Supplementary material for: Preparation of Melatonin-Loaded Nanoparticles with Targeting and Sustained Release Function and Their Application in Osteoarthritis
Source: MDPI journal article supplement (doi:10.3390/ijms24108740), 2023-05-14
Supplement: s1 [file s1]

## Supplementary Materials

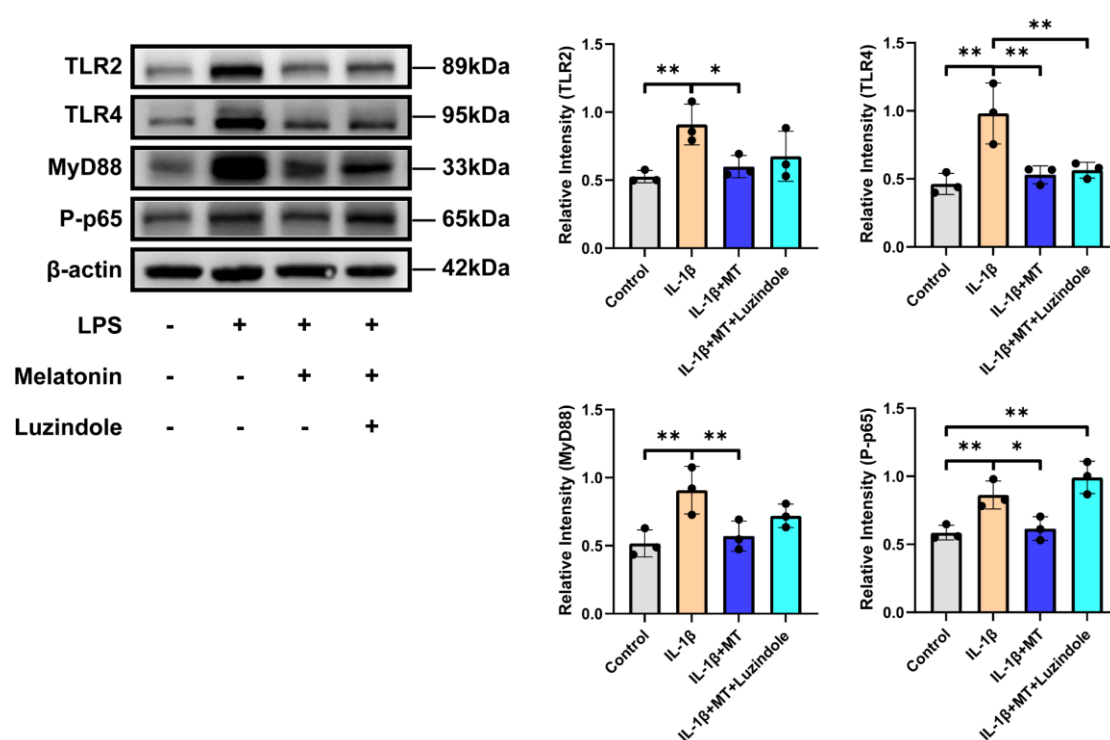

Figure S1. Western blot results and semi-quantitative analysis of TLR2/4-MyD88-NFκB in

RAW264.7. Data are presented as means  $\pm$  SD: \* p < 0.05, \*\* p < 0.01. MT, melatonin.

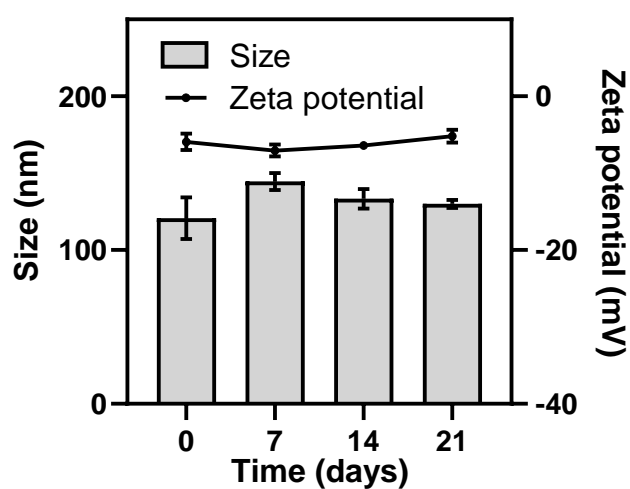

Figure S2. Particle size and zeta potential of MT@PLGA-COLBP nanoparticles at 0-7-14-21 days.

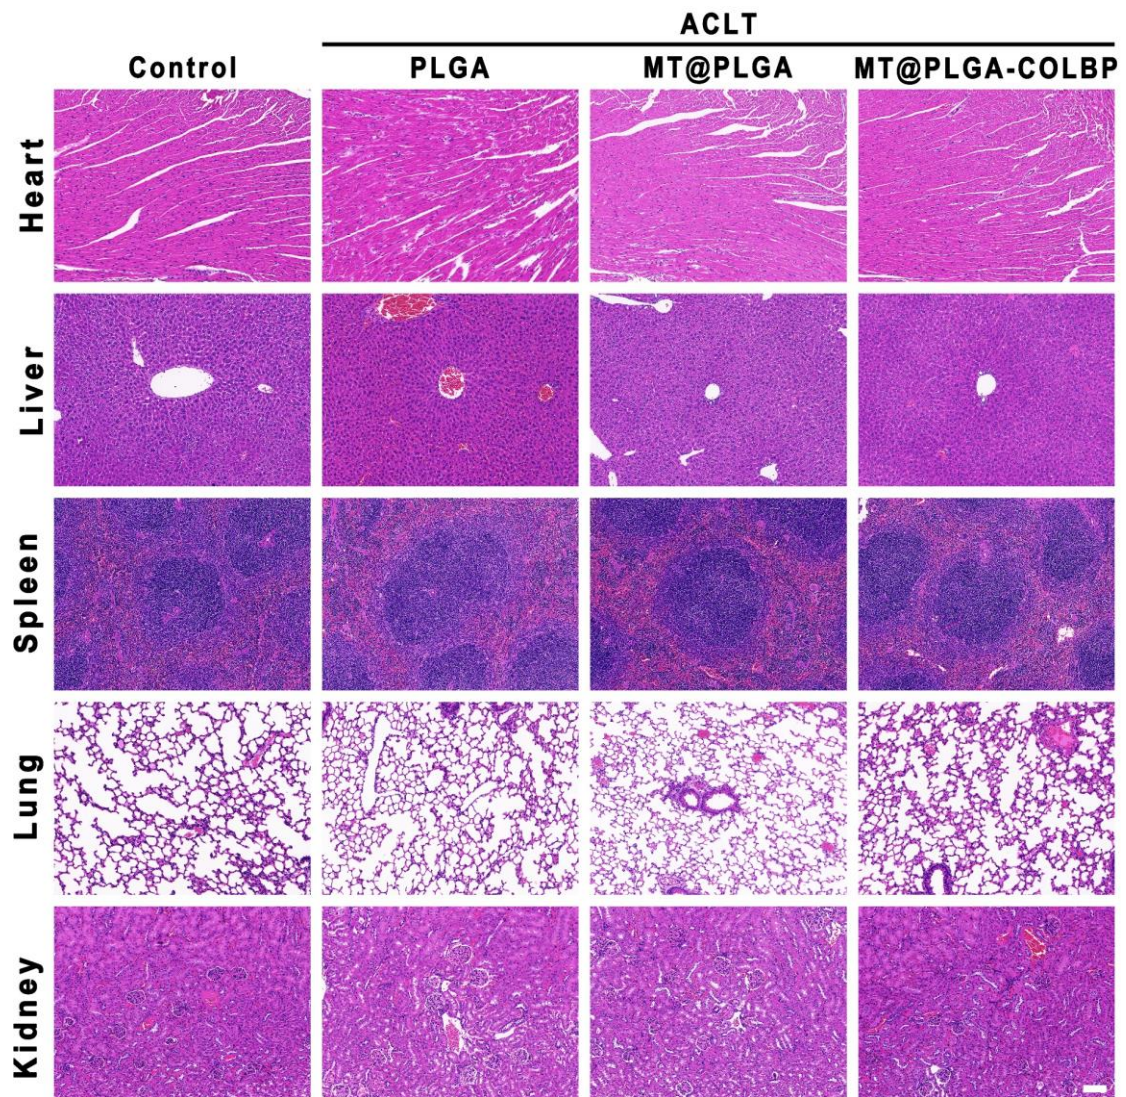

Figure S3. HE staining of mouse heart, liver, spleen, lung and kidney after treatment. Scale bar = 100 $\mu$ m.
